# Supplementary material
Source: publisher figshare collection journal article supplement (https://frontiersin.figshare.com/ndownloader/files/30446037)
Supplement: Supplementary file [file 30446037]

## *Supplementary Material*

### S5- Critical appraisal of studies reporting prevalence data

Abubakr 2021

|                                                                                                 | Yes | No | Unclear | Not applicable |
|-------------------------------------------------------------------------------------------------|-----|----|---------|----------------|
| 1. Was the sample frame appropriate to address the target population?                           |     | X  |         |                |
| 2. Were study participants sampled in an appropriate way?                                       | X   |    |         |                |
| 3. Was the sample size adequate?                                                                | X   |    |         |                |
| 4. Were the study subjects and the setting described in detail?                                 | X   |    |         |                |
| 5. Was the data analysis conducted with sufficient coverage of the identified sample?           | X   |    |         |                |
| 6. Were valid methods used for the identification of the condition?                             |     | X  |         |                |
| 7. Was the condition measured in a standard, reliable way for all participants?                 |     | X  |         |                |
| 8. Was there appropriate statistical analysis?                                                  |     |    |         | X              |
| 9. Was the response rate adequate, and if not, was the low response rate managed appropriately? | X   |    |         |                |

Overall appraisal:      Include   X   Exclude      Seek further info

Comments (Including reason for exclusion):

Askin 2020

|                                                                                       | Yes | No | Unclear | Not applicable |
|---------------------------------------------------------------------------------------|-----|----|---------|----------------|
| 1. Was the sample frame appropriate to address the target population?                 | X   |    |         |                |
| 2. Were study participants sampled in an appropriate way?                             | X   |    |         |                |
| 3. Was the sample size adequate?                                                      |     |    |         |                |
| 4. Were the study subjects and the setting described in detail?                       | X   |    |         |                |
| 5. Was the data analysis conducted with sufficient coverage of the identified sample? | X   |    |         |                |
| 6. Were valid methods used for the identification of the condition?                   |     | X  |         |                |
| 7. Was the condition measured in a standard, reliable way for all participants?       |     | X  |         |                |
| 8. Was there appropriate statistical analysis?                                        |     |    |         | X              |

|                                                                                                 |   |  |  |  |
|-------------------------------------------------------------------------------------------------|---|--|--|--|
| 9. Was the response rate adequate, and if not, was the low response rate managed appropriately? | X |  |  |  |
|-------------------------------------------------------------------------------------------------|---|--|--|--|

Overall appraisal:      Include      Exclude    X    Seek further info

Comments (Including reason for exclusion): The study aimed to investigate cutaneous manifestations in patients with COVID-19. Available data do not suggest specific focus on the mucous membranes and the mouth.

#### Biadsee 2020

|                                                                                                 | Yes | No | Unclear | Not applicable |
|-------------------------------------------------------------------------------------------------|-----|----|---------|----------------|
| 1. Was the sample frame appropriate to address the target population?                           | X   |    |         |                |
| 2. Were study participants sampled in an appropriate way?                                       | X   |    |         |                |
| 3. Was the sample size adequate?                                                                | X   |    |         |                |
| 4. Were the study subjects and the setting described in detail?                                 | X   |    |         |                |
| 5. Was the data analysis conducted with sufficient coverage of the identified sample?           | X   |    |         |                |
| 6. Were valid methods used for the identification of the condition?                             |     | X  |         |                |
| 7. Was the condition measured in a standard, reliable way for all participants?                 |     | X  |         |                |
| 8. Was there appropriate statistical analysis?                                                  |     |    |         | X              |
| 9. Was the response rate adequate, and if not, was the low response rate managed appropriately? | X   |    |         |                |

Overall appraisal:      Include    X    Exclude      Seek further info

Comments (Including reason for exclusion):

#### Fantozzi 2020

|                                                                                       | Yes | No | Unclear | Not applicable |
|---------------------------------------------------------------------------------------|-----|----|---------|----------------|
| 1. Was the sample frame appropriate to address the target population?                 | X   |    |         |                |
| 2. Were study participants sampled in an appropriate way?                             | X   |    |         |                |
| 3. Was the sample size adequate?                                                      | X   |    |         |                |
| 4. Were the study subjects and the setting described in detail?                       | X   |    |         |                |
| 5. Was the data analysis conducted with sufficient coverage of the identified sample? | X   |    |         |                |
| 6. Were valid methods used for the identification of the condition?                   |     | X  |         |                |
| 7. Was the condition measured in a standard, reliable way for all participants?       |     | X  |         |                |

|                                                                                                 |   |  |  |   |
|-------------------------------------------------------------------------------------------------|---|--|--|---|
| 8. Was there appropriate statistical analysis?                                                  |   |  |  | X |
| 9. Was the response rate adequate, and if not, was the low response rate managed appropriately? | X |  |  |   |

Overall appraisal:      Include      Exclude      Seek further info

Comments (Including reason for exclusion):

Fidan 2021

|                                                                                                 | Yes | No | Unclear | Not applicable |
|-------------------------------------------------------------------------------------------------|-----|----|---------|----------------|
| 1. Was the sample frame appropriate to address the target population?                           | X   |    |         |                |
| 2. Were study participants sampled in an appropriate way?                                       | X   |    |         |                |
| 3. Was the sample size adequate?                                                                |     | X  |         |                |
| 4. Were the study subjects and the setting described in detail?                                 | X   |    |         |                |
| 5. Was the data analysis conducted with sufficient coverage of the identified sample?           | X   |    |         |                |
| 6. Were valid methods used for the identification of the condition?                             | X   |    |         |                |
| 7. Was the condition measured in a standard, reliable way for all participants?                 | X   |    |         |                |
| 8. Was there appropriate statistical analysis?                                                  |     |    |         | X              |
| 9. Was the response rate adequate, and if not, was the low response rate managed appropriately? | X   |    |         |                |

Overall appraisal:      Include    X    Exclude      Seek further info

Comments (Including reason for exclusion):

Gherlone 2021

|                                                                                       | Yes | No | Unclear | Not applicable |
|---------------------------------------------------------------------------------------|-----|----|---------|----------------|
| 1. Was the sample frame appropriate to address the target population?                 | X   |    |         |                |
| 2. Were study participants sampled in an appropriate way?                             | X   |    |         |                |
| 3. Was the sample size adequate?                                                      |     |    |         |                |
| 4. Were the study subjects and the setting described in detail?                       | X   |    |         |                |
| 5. Was the data analysis conducted with sufficient coverage of the identified sample? | X   |    |         |                |
| 6. Were valid methods used for the identification of the condition?                   | X   |    |         |                |
| 7. Was the condition measured in a standard, reliable way for all participants?       | X   |    |         |                |

|                                                                                                 |   |  |  |   |
|-------------------------------------------------------------------------------------------------|---|--|--|---|
| 8. Was there appropriate statistical analysis?                                                  |   |  |  | X |
| 9. Was the response rate adequate, and if not, was the low response rate managed appropriately? | X |  |  |   |

Overall appraisal:      Include    X    Exclude      Seek further info

Comments (Including reason for exclusion):

Khabadze 2020

|                                                                                                 | Yes | No | Unclear | Not applicable |
|-------------------------------------------------------------------------------------------------|-----|----|---------|----------------|
| 1. Was the sample frame appropriate to address the target population?                           | X   |    |         |                |
| 2. Were study participants sampled in an appropriate way?                                       | X   |    |         |                |
| 3. Was the sample size adequate?                                                                |     | X  |         |                |
| 4. Were the study subjects and the setting described in detail?                                 | X   |    |         |                |
| 5. Was the data analysis conducted with sufficient coverage of the identified sample?           | X   |    |         |                |
| 6. Were valid methods used for the identification of the condition?                             |     |    | X       |                |
| 7. Was the condition measured in a standard, reliable way for all participants?                 |     |    | X       |                |
| 8. Was there appropriate statistical analysis?                                                  |     |    |         | X              |
| 9. Was the response rate adequate, and if not, was the low response rate managed appropriately? | X   |    |         |                |

Overall appraisal:      Include      Exclude    X    Seek further info

Comments (Including reason for exclusion): Available data mention oral conditions that most likely are concurrent with COVID-19 and not related to this particular infection (plaque on the tongue and gingival pigmentation). No data are available on specific oral lesions.

Nuno-Gonzalez 2021

|                                                                                       | Yes | No | Unclear | Not applicable |
|---------------------------------------------------------------------------------------|-----|----|---------|----------------|
| 1. Was the sample frame appropriate to address the target population?                 | X   |    |         |                |
| 2. Were study participants sampled in an appropriate way?                             | X   |    |         |                |
| 3. Was the sample size adequate?                                                      | X   |    |         |                |
| 4. Were the study subjects and the setting described in detail?                       | X   |    |         |                |
| 5. Was the data analysis conducted with sufficient coverage of the identified sample? | X   |    |         |                |
| 6. Were valid methods used for the identification of the condition?                   |     | X  |         |                |

|                                                                                                 |   |   |  |   |
|-------------------------------------------------------------------------------------------------|---|---|--|---|
| 7. Was the condition measured in a standard, reliable way for all participants?                 |   | X |  |   |
| 8. Was there appropriate statistical analysis?                                                  |   |   |  | X |
| 9. Was the response rate adequate, and if not, was the low response rate managed appropriately? | X |   |  |   |

Overall appraisal:      Include   X   Exclude      Seek further info

Comments (Including reason for exclusion):

Rekhtman 2020

|                                                                                                 | Yes | No | Unclear | Not applicable |
|-------------------------------------------------------------------------------------------------|-----|----|---------|----------------|
| 1. Was the sample frame appropriate to address the target population?                           | X   |    |         |                |
| 2. Were study participants sampled in an appropriate way?                                       | X   |    |         |                |
| 3. Was the sample size adequate?                                                                |     |    |         |                |
| 4. Were the study subjects and the setting described in detail?                                 | X   |    |         |                |
| 5. Was the data analysis conducted with sufficient coverage of the identified sample?           | X   |    |         |                |
| 6. Were valid methods used for the identification of the condition?                             |     | X  |         |                |
| 7. Was the condition measured in a standard, reliable way for all participants?                 |     | X  |         |                |
| 8. Was there appropriate statistical analysis?                                                  |     |    |         | X              |
| 9. Was the response rate adequate, and if not, was the low response rate managed appropriately? | X   |    |         |                |

Overall appraisal:      Include      Exclude   X   Seek further info

Comments (Including reason for exclusion): The study aimed to study eruptions on all body parts in patients with COVID-19. Available data do not suggest focus on the mouth.

Riad 2020

|                                                                                       | Yes | No | Unclear | Not applicable |
|---------------------------------------------------------------------------------------|-----|----|---------|----------------|
| 1. Was the sample frame appropriate to address the target population?                 | X   |    |         |                |
| 2. Were study participants sampled in an appropriate way?                             | X   |    |         |                |
| 3. Was the sample size adequate?                                                      | X   |    |         |                |
| 4. Were the study subjects and the setting described in detail?                       | X   |    |         |                |
| 5. Was the data analysis conducted with sufficient coverage of the identified sample? | X   |    |         |                |
| 6. Were valid methods used for the identification of the condition?                   |     | X  |         |                |

|                                                                                                 |   |   |  |   |
|-------------------------------------------------------------------------------------------------|---|---|--|---|
| 7. Was the condition measured in a standard, reliable way for all participants?                 |   | X |  |   |
| 8. Was there appropriate statistical analysis?                                                  |   |   |  | X |
| 9. Was the response rate adequate, and if not, was the low response rate managed appropriately? | X |   |  |   |

Overall appraisal:      Include    X    Exclude      Seek further info

Comments (Including reason for exclusion): The study aimed to study eruptions on all body parts in patients with COVID-19. Available data do not suggest focus on the mouth.
